# Supplementary material
Source: Springer Nature journal article supplement (https://www.springermedizin.de/resource/supplementary/13058_2010_2759_MOESM2_ESM.pdf/9702094)

(a) Whites

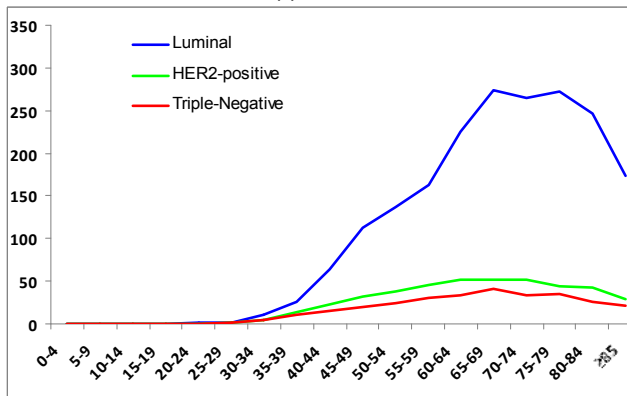

(b) Blacks

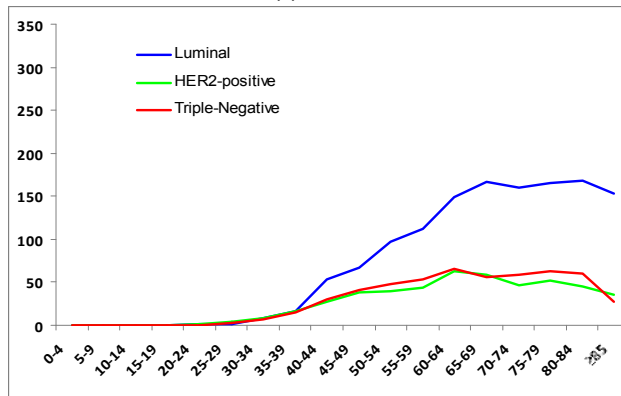

(c) Hispanics

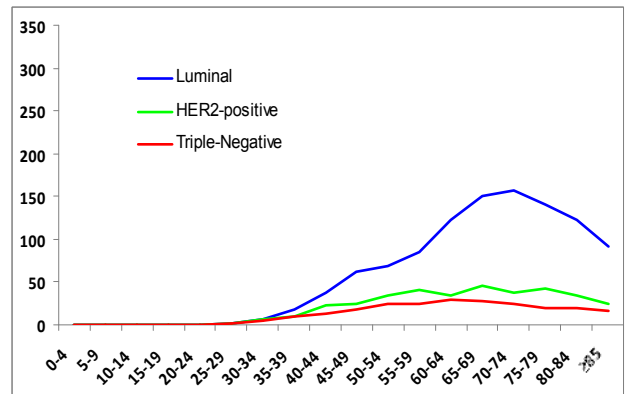

(d) Asians

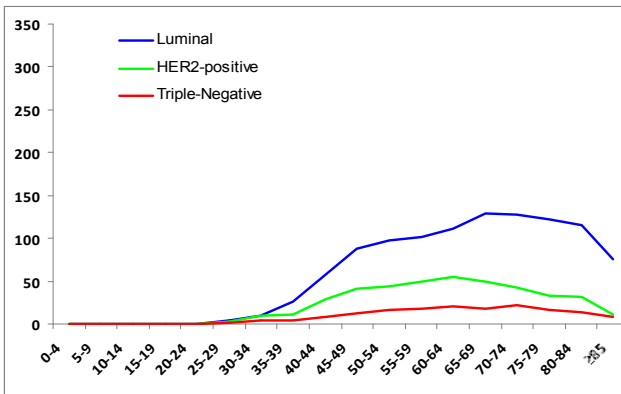

Supplement: MOESM2 [file 9702094]
